# Supplementary material for: Structural and physical properties of two distinct 2D lead halides with intercalated Cu(ii)
Source: Royal Society of Chemistry journal article supplement (doi:10.1039/d4tc01322k), 2024-01-01
Supplement: d4tc01322k1.pdf [file d4tc01322k1.pdf]

# Supporting Information

## Structural and Physical Properties of Two Distinct 2D Lead Halides with Intercalated Cu(II)

Kanika Parashar<sup>a</sup>, Zheng Zhang<sup>b</sup>, Volodymyr Buturlim<sup>c</sup>, Jie Jiang<sup>d</sup>, Alexander Roseborough<sup>e</sup>, May Nyman<sup>e</sup>, Krzysztof Gofryk<sup>c</sup>, Ruth Pachter<sup>d</sup>, Bayram Saparov<sup>a\*</sup>

<sup>a</sup>Department of Chemistry & Biochemistry, The University of Oklahoma, Norman, Oklahoma 73019-5251, United States

<sup>b</sup>Department of Chemistry, Tulane University, New Orleans, Louisiana 70118, United States

<sup>c</sup>Glenn T. Seaborg Institute, Idaho National Laboratory, Idaho Falls, ID 83415, USA

<sup>d</sup>Materials and Manufacturing Directorate, Air Force Research Laboratory, Wright-Patterson Air Force Base, OH 45433, USA

<sup>e</sup>Department of Chemistry, Oregon State University, Corvallis, Oregon 97331, USA

\*Author to whom correspondence should be addressed: [saparov@ou.edu](mailto:saparov@ou.edu)

**Table S1.** Selected single crystal data and structure refinement parameters for [Cu(O<sub>2</sub>C-CH<sub>2</sub>-NH<sub>2</sub>)<sub>2</sub>]Pb<sub>2</sub>Br<sub>4</sub> and [Cu(O<sub>2</sub>C-(CH<sub>2</sub>)<sub>3</sub>-NH<sub>3</sub>)<sub>2</sub>]PbBr<sub>4</sub>.

| Formula                                                             | [Cu(O <sub>2</sub> C-CH <sub>2</sub> -NH <sub>2</sub> ) <sub>2</sub> ]Pb <sub>2</sub> Br <sub>4</sub>       | [Cu(O <sub>2</sub> C-(CH <sub>2</sub> ) <sub>3</sub> -NH <sub>3</sub> ) <sub>2</sub> ]PbBr <sub>4</sub>  |
|---------------------------------------------------------------------|-------------------------------------------------------------------------------------------------------------|----------------------------------------------------------------------------------------------------------|
| Formula weight (g/mol)                                              | 945.68                                                                                                      | 796.61                                                                                                   |
| Temperature (K)                                                     | 100(2)                                                                                                      | 100(2)                                                                                                   |
| Wavelength (Å)                                                      | 0.71073                                                                                                     | 0.71073                                                                                                  |
| Crystal system                                                      | Monoclinic                                                                                                  | Monoclinic                                                                                               |
| Space group                                                         | <i>P</i> 2 <sub>1</sub> / <i>c</i>                                                                          | <i>P</i> 2 <sub>1</sub> / <i>n</i>                                                                       |
| <i>Z</i>                                                            | 2                                                                                                           | 4                                                                                                        |
| Unit cell parameters (Å)                                            | <i>a</i> = 8.5509(2)<br><i>b</i> = 10.9451(3)<br><i>c</i> = 8.3697(2)<br>$\beta$ = 108.700(10) <sup>o</sup> | <i>a</i> = 8.4521(7)<br><i>b</i> = 8.3195(7)<br><i>c</i> = 26.858(2)<br>$\beta$ = 98.396(3) <sup>o</sup> |
| Volume (Å <sup>3</sup> )                                            | 741.97(3)                                                                                                   | 1868.4(3)                                                                                                |
| Density (g/cm <sup>3</sup> )                                        | 4.233                                                                                                       | 2.832                                                                                                    |
| Absorption coefficient<br>( $\mu$ ) (mm <sup>-1</sup> )             | 34.826                                                                                                      | 18.701                                                                                                   |
| $\theta_{\min}$ - $\theta_{\max}$ (°)                               | 3.129 to 26.370                                                                                             | 2.444 to 33.787                                                                                          |
| Reflections collected                                               | 40882                                                                                                       | 77900                                                                                                    |
| Independent reflections                                             | 1515                                                                                                        | 7485                                                                                                     |
| <i>R</i> <sup>a</sup> indices ( <i>I</i> > 2 $\sigma$ ( <i>I</i> )) | <i>R</i> <sub>1</sub> = 0.0131<br><i>wR</i> <sub>2</sub> = 0.0298                                           | <i>R</i> <sub>1</sub> = 0.02777<br><i>wR</i> <sub>2</sub> = 0.0696                                       |
| Goodness-of-fit on <i>F</i> <sup>2</sup>                            | 1.128                                                                                                       | 1.023                                                                                                    |
| Largest diff. peak and<br>hole (e <sup>-</sup> /Å <sup>3</sup> )    | 0.768 and -0.651                                                                                            | 1.433 and -1.649                                                                                         |

$${}_aR_1 = \frac{\sum ||F_0| - |F_c||}{\sum |F_0|}; wR_2 = \frac{|\Sigma|w(F_0^2 - F_c^2)^2|}{\sum |wF_0^{22}|}_{1/2}$$

where  $w = 1/|\sigma^2 F_0^2 + (AP)^2 + BP|$ , with  $P = (F_0^2 + 2F_c^2)/3$  and weight coefficients A and B

**Table S2.** Atomic coordinates and equivalent isotropic displacement parameters ( $U_{\text{eq}}^a$ ) for  $[\text{Cu}(\text{O}_2\text{C}-\text{CH}_2-\text{NH}_2)_2]\text{Pb}_2\text{Br}_4$ .

| Atom | <i>x</i>   | <i>y</i>   | <i>z</i>   | $U_{\text{eq}}, \text{\AA}^2$ |
|------|------------|------------|------------|-------------------------------|
| Pb1  | 0.5919(2)  | 0.70010(2) | 0.63273(2) | 0.01903(6)                    |
| Br1  | 0.60133(4) | 0.44554(3) | 0.72215(4) | 0.01925(8)                    |
| Br2  | 0.79076(4) | 0.75829(3) | 0.97054(4) | 0.02220(9)                    |
| Cu1  | 0.0000000  | 0.5000000  | 0.5000000  | 0.02486(14)                   |
| O1   | 0.3613(3)  | 0.6614(2)  | 0.8544(3)  | 0.0244(5)                     |
| O2   | 0.2003(3)  | 0.5971(2)  | 0.6073(3)  | 0.0207(5)                     |
| N1   | 0.0014(4)  | 0.4709(3)  | 0.7322(3)  | 0.0223(6)                     |
| C1   | 0.2335(4)  | 0.6095(3)  | 0.7650(4)  | 0.0174(6)                     |
| C2   | 0.1134(4)  | 0.5582(3)  | 0.8463(4)  | 0.0240(7)                     |

<sup>a</sup> $U_{\text{eq}}$  is defined as one third of the trace of the orthogonalized  $U_{ij}$  tensor.

**Table S3.** Atomic coordinates and equivalent isotropic displacement parameters ( $U_{\text{eq}}^a$ ) for  $[\text{Cu}(\text{O}_2\text{C}-(\text{CH}_2)_3-\text{NH}_3)_2]\text{PbBr}_4$ .

| Atom | <i>x</i>   | <i>y</i>   | <i>z</i>    | $U_{\text{eq}}, \text{\AA}^2$ |
|------|------------|------------|-------------|-------------------------------|
| Pb1  | 0.50976(2) | 0.49993(2) | 0.24772(2)  | 0.01877(4)                    |
| Br1  | 0.54891(4) | 0.39650(4) | 0.35970(2)  | 0.02523(7)                    |
| Br2  | 0.23518(4) | 0.72381(4) | 0.26259(2)  | 0.02740(7)                    |
| Br3  | 0.42664(5) | 0.54648(5) | 0.14119(2)  | 0.03332(8)                    |
| Br4  | 0.70424(5) | 0.79916(5) | 0.26455(2)  | 0.03641(9)                    |
| Cu1  | 0.52222(4) | 0.44714(4) | 0.45518(2)  | 0.01714(7)                    |
| O1A  | 0.6224(3)  | 0.6581(3)  | 0.45384(9)  | 0.0270(5)                     |
| O2A  | 0.5813(3)  | 0.7530(3)  | 0.52866(9)  | 0.0308(5)                     |
| N1A  | 0.4825(5)  | 1.0084(4)  | 0.34069(14) | 0.0362(8)                     |
| C1A  | 0.6289(4)  | 0.7669(3)  | 0.48674(11) | 0.0203(5)                     |
| C2A  | 0.6968(4)  | 0.9276(4)  | 0.47421(12) | 0.0237(6)                     |
| C3A  | 0.6785(4)  | 0.9630(4)  | 0.41764(13) | 0.0269(6)                     |
| C4A  | 0.5053(4)  | 0.9549(5)  | 0.39442(13) | 0.0302(7)                     |
| O1B  | 0.3076(3)  | 0.5444(3)  | 0.43678(9)  | 0.0292(5)                     |
| O2B  | 0.2727(3)  | 0.6374(3)  | 0.51208(8)  | 0.0278(5)                     |
| N1B  | 0.1316(4)  | 0.4457(4)  | 0.34737(11) | 0.0307(6)                     |
| C1B  | 0.2244(4)  | 0.6107(4)  | 0.46665(12) | 0.0212(5)                     |
| C2B  | 0.0558(4)  | 0.6594(4)  | 0.44612(13) | 0.0287(7)                     |
| C3B  | -0.0385(5) | 0.5391(6)  | 0.41049(17) | 0.0419(9)                     |
| C4B  | -0.0132(6) | 0.5377(7)  | 0.35657(17) | 0.0479(11)                    |

<sup>a</sup> $U_{\text{eq}}$  is defined as one third of the trace of the orthogonalized  $U_{ij}$  tensor.

**Table S4.** A comparison of bond distances and angles within the PbBr<sub>5</sub>O<sub>3</sub> dodecahedra in [Cu(O<sub>2</sub>C-CH<sub>2</sub>-NH<sub>2</sub>)<sub>2</sub>]Pb<sub>2</sub>Br<sub>4</sub>.

| <b>Atom pair</b> | <b>Distance (Å)</b> | <b>Label</b>    | <b>Angle (°)</b> |
|------------------|---------------------|-----------------|------------------|
| Pb1 – O1         | 2.593(2)            | O1 – Pb1 – O1   | 120.20(9)        |
| Pb1 – O1         | 2.727(2)            | O1 – Pb1 – Br1  | 79.29(6)         |
| Pb1 – Br1        | 2.9265(3)           |                 |                  |
| Pb1 – Br2        | 3.1355(3)           | Br1 – Pb1 – Br2 | 78.33(5)         |
| Pb1 – Br2        | 3.1532(3)           | Br2 – Pb1 – Br1 | 73.375(8)        |
| Pb1 – Br1        | 3.2119(3)           | Br1 – Pb1 – Br1 | 136.476(10)      |
| Pb1 – Br1        | 3.2336(3)           |                 |                  |

**Table S5.** A comparison of bond distances and angles in the  $[\text{PbBr}_6]^{4-}$  octahedra in  $[\text{Cu}(\text{O}_2\text{C}(\text{CH}_2)_3\text{-NH}_3)_2]\text{PbBr}_4$ .

| <b>Atom pair</b> | <b>Distance (Å)</b> | <b>Label</b>    | <b>Angle (°)</b> |
|------------------|---------------------|-----------------|------------------|
| Pb1 – Br3        | 2.8711(4)           | Br3 – Pb1 – Br4 | 95.031(13)       |
| Pb1 – Br4        | 2.9810(4)           | Br3 – Pb1 – Br4 | 92.839(12)       |
| Pb1 – Br4        | 2.9958(4)           | Br4 – Pb1 – Br4 | 92.658(8)        |
| Pb1 – Br2        | 3.0472(4)           | Br3 – Pb1 – Br2 | 88.164(11)       |
| Pb1 – Br2        | 3.0777(4)           | Br4 – Pb1 – Br2 | 83.300(12)       |
| Pb1 – Br1        | 3.0992(4)           | Br4 – Pb1 – Br2 | 175.908(11)      |
|                  |                     | Br3 – Pb1 – Br2 | 86.988(11)       |
|                  |                     | Br4 – Pb1 – Br2 | 170.308(11)      |
|                  |                     | Br4 – Pb1 – Br2 | 96.714(13)       |
|                  |                     | Br2 – Pb1 – Br2 | 87.297(8)        |
|                  |                     | Br3 – Pb1 – Br1 | 168.661(12)      |
|                  |                     | Br4 – Pb1 – Br1 | 96.107(11)       |
|                  |                     | Br4 – Pb1 – Br1 | 88.764(11)       |
|                  |                     | Br2 – Pb1 – Br1 | 91.027(10)       |
|                  |                     | Br2 – Pb1 – Br1 | 81.676(10)       |

## 1. The fabricated X-ray detector and the setup used for the electrical measurements

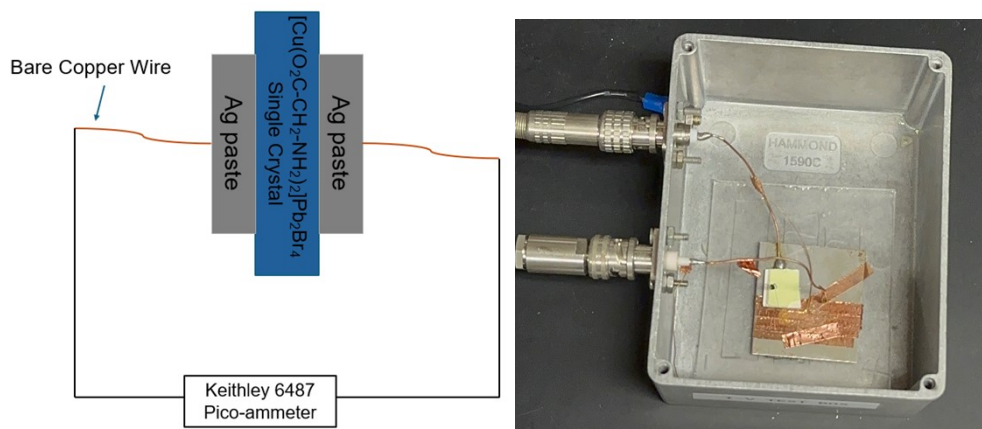

**Figure S1.** A schematic illustrating the fabricated X-ray detector in this work (left) and the setup used for electrical measurements (right).

The X-ray detector fabricated in this study is a planar-type detector with high-quality silver paste (purchased from Ted Pella, Inc.) manually brushed on the two opposite sides of a single crystal. Bare copper wires were attached to the crystal and then the crystal was connected to the Keithley 6487 pico-ammeter (an in-house built equipment, see Fig. S1 above) for conductivity and detector sensitivity measurements.

## 2. Images of [Cu(O<sub>2</sub>C-CH<sub>2</sub>-NH<sub>2</sub>)<sub>2</sub>]Pb<sub>2</sub>Br<sub>4</sub> crystals grown using different methods

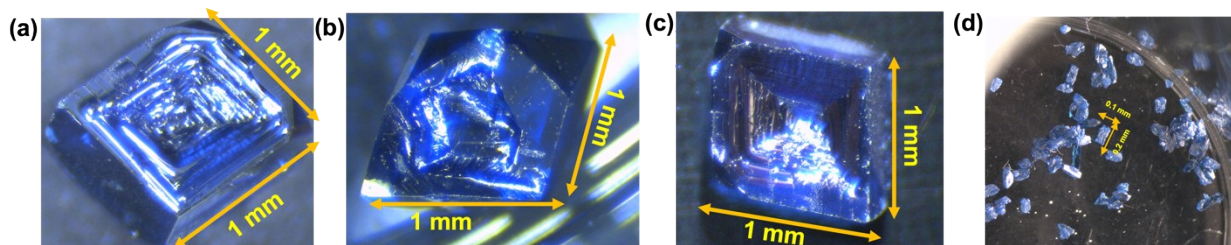

**Figure S2.** Photographs of the [Cu(O<sub>2</sub>C-CH<sub>2</sub>-NH<sub>2</sub>)<sub>2</sub>]Pb<sub>2</sub>Br<sub>4</sub> crystals synthesized using (a) slow evaporation of solvent, (b) slow cooling of saturated solution, (c) evaporation of solvent on heating and (d) vapor diffusion.

3. Images of  $[\text{Cu}(\text{O}_2\text{C}-\text{CH}_2-\text{NH}_2)_2]\text{Pb}_2\text{Br}_4$  crystals grown using the liquid-liquid diffusion method

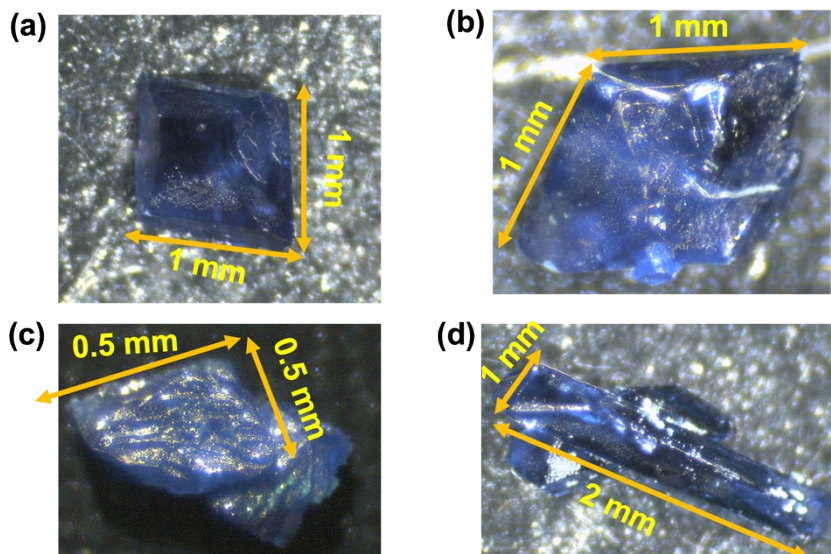

**Figure S3.** Photographs of the  $[\text{Cu}(\text{O}_2\text{C}-\text{CH}_2-\text{NH}_2)_2]\text{Pb}_2\text{Br}_4$  crystals synthesized using liquid-liquid diffusion with solvents (a) isopropanol, (b) acetonitrile, (c) diethyl ether and (d) methanol.



#### 4. Images of $[\text{Cu}(\text{O}_2\text{C}-(\text{CH}_2)_3-\text{NH}_3)_2]\text{PbBr}_4$ crystals obtained via different methods

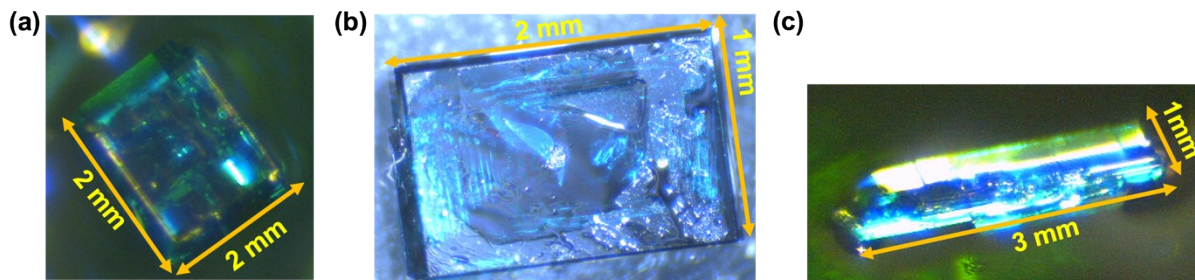

**Figure S4.** Photographs of the  $[\text{Cu}(\text{O}_2\text{C}-(\text{CH}_2)_3-\text{NH}_3)_2]\text{PbBr}_4$  crystals synthesized using (a) slow evaporation of solvent, (b) slow cooling of saturated solution and (c) evaporation of solvent on heating.

#### 5. Comparative analysis of PXRD patterns for crystals obtained via varied methods

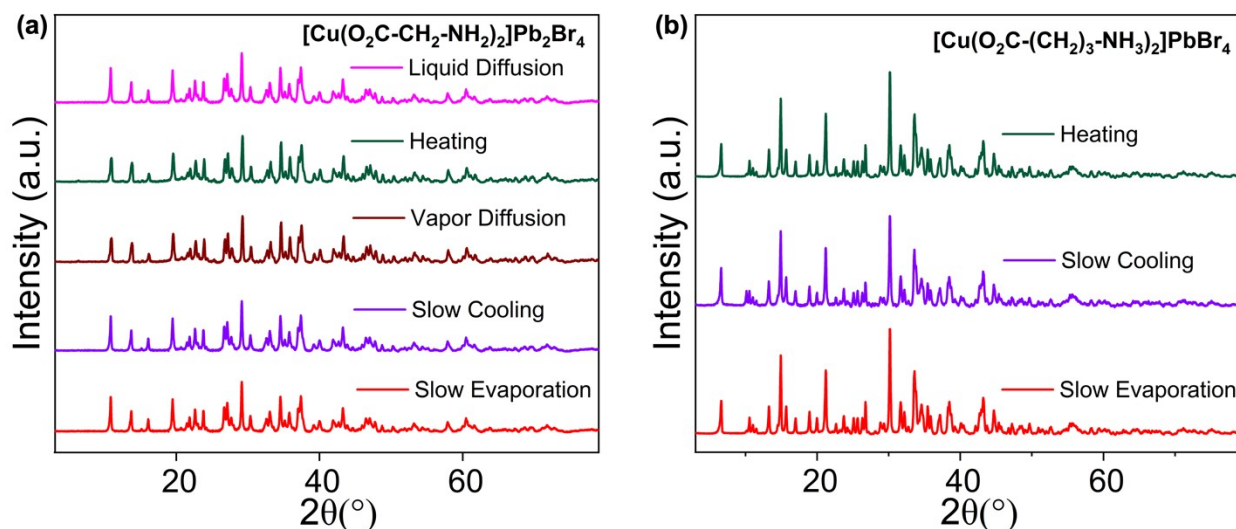

**Figure S5.** PXRD patterns showing the similarity between the synthesized crystals by using different solution synthesis methods for (a)  $[\text{Cu}(\text{O}_2\text{C}-\text{CH}_2-\text{NH}_2)_2]\text{Pb}_2\text{Br}_4$  and (b)  $[\text{Cu}(\text{O}_2\text{C}-(\text{CH}_2)_3-\text{NH}_3)_2]\text{PbBr}_4$  crystals.

## 6. Pawley fitting of Room Temperature PXRD patterns

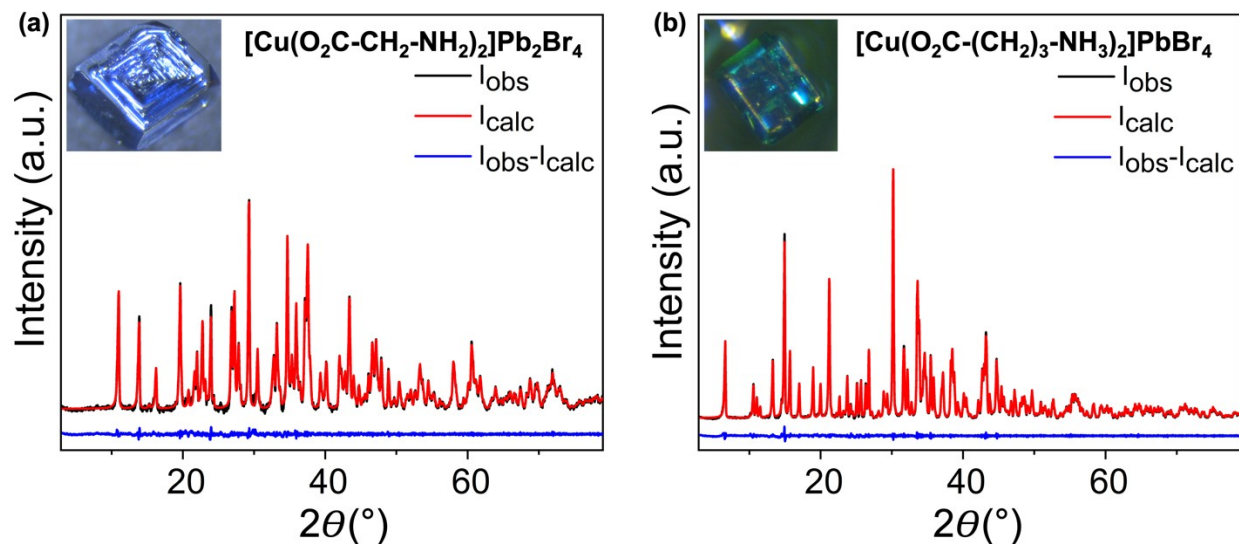

**Figure S6.** Room temperature PXRD patterns (in black) fitted using the Pawley method (in red) for (a)  $[\text{Cu}(\text{O}_2\text{C}-\text{CH}_2-\text{NH}_2)_2]\text{Pb}_2\text{Br}_4$  and (b)  $[\text{Cu}(\text{O}_2\text{C}-(\text{CH}_2)_3-\text{NH}_3)_2]\text{PbBr}_4$ . Difference between the measured and calculated patterns are shown in blue.

## 7. Visualization of interlayer distances in $[\text{Cu}(\text{O}_2\text{C}-\text{CH}_2-\text{NH}_2)_2]\text{Pb}_2\text{Br}_4$ and $[\text{Cu}(\text{O}_2\text{C}-(\text{CH}_2)_3-\text{NH}_3)_2]\text{PbBr}_4$

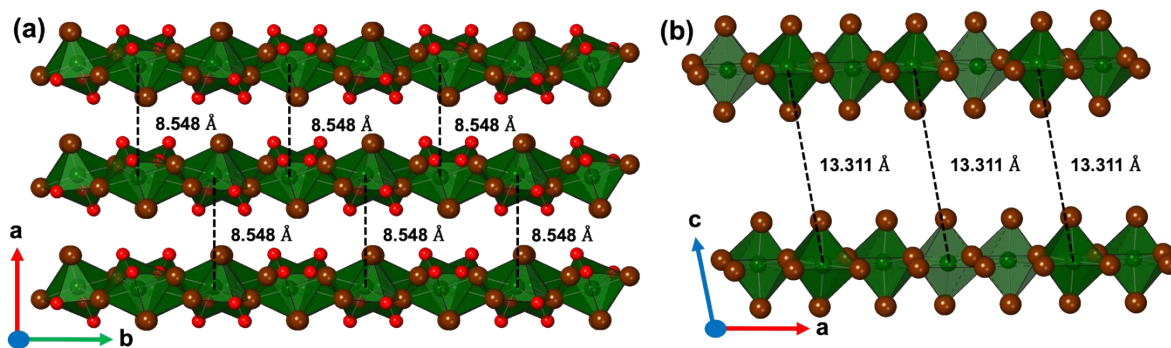

**Figure S7.** Interlayer distance between the layers of lead bromide in compounds (a)  $[\text{Cu}(\text{O}_2\text{C}-\text{CH}_2-\text{NH}_2)_2]\text{Pb}_2\text{Br}_4$  and (b)  $[\text{Cu}(\text{O}_2\text{C}-(\text{CH}_2)_3-\text{NH}_3)_2]\text{PbBr}_4$  are depicted. Lead, bromine, and oxygen are denoted by green, brown, and red spheres, respectively.

## 8. Visualization of interlayer distances in $(\text{C}_6\text{H}_5\text{C}_2\text{H}_4\text{NH}_3)_2\text{PbBr}_4$

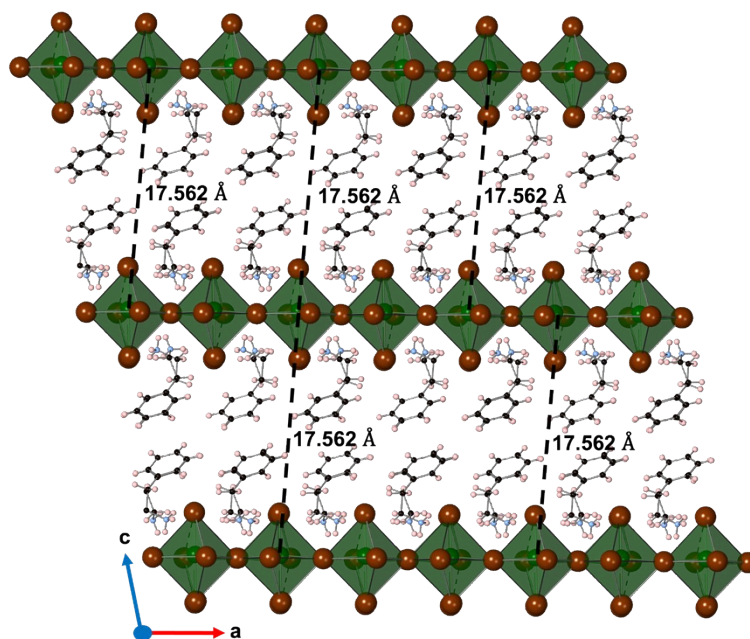

**Figure S8.** Interlayer distance between the layers of lead bromide in compound  $(\text{C}_6\text{H}_5\text{C}_2\text{H}_4\text{NH}_3)_2\text{PbBr}_4$  is depicted within the crystal structure. Lead, bromine, oxygen, carbon, and hydrogen are denoted by green, brown, red spheres, black and peach, respectively.

9. UV-Vis absorption spectra for  $[\text{Cu}(\text{O}_2\text{C}-\text{CH}_2-\text{NH}_2)_2]\text{Pb}_2\text{Br}_4$  and  $[\text{Cu}(\text{O}_2\text{C}-(\text{CH}_2)_3-\text{NH}_3)_2]\text{PbBr}_4$  precursor solutions

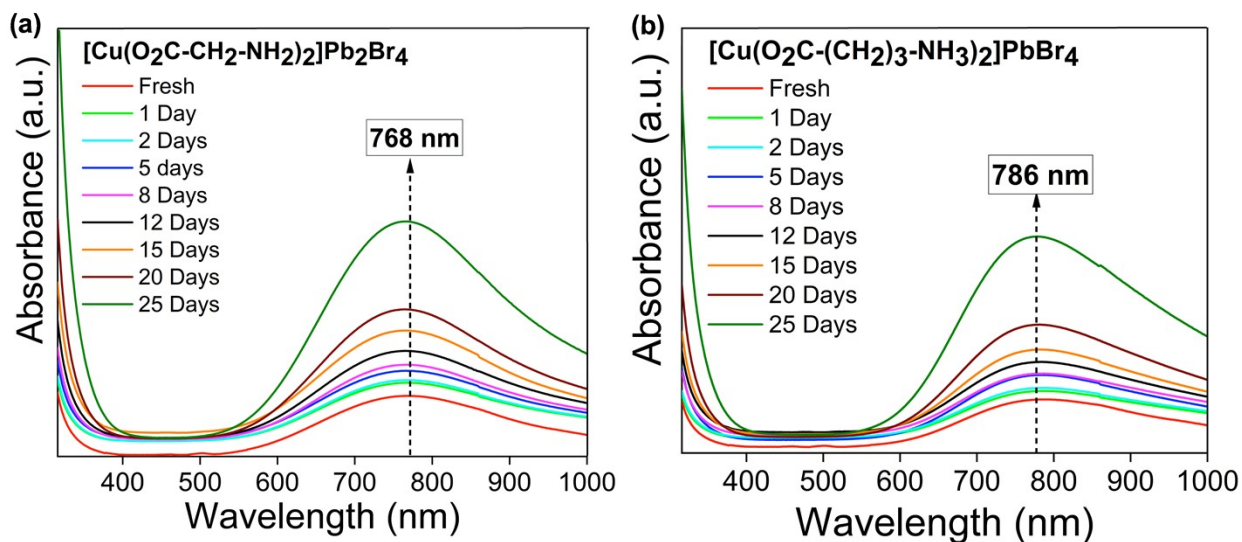

**Figure S9.** UV-Vis absorption spectra for  $[\text{Cu}(\text{O}_2\text{C}-\text{CH}_2-\text{NH}_2)_2]\text{Pb}_2\text{Br}_4$  and (b)  $[\text{Cu}(\text{O}_2\text{C}-(\text{CH}_2)_3-\text{NH}_3)_2]\text{PbBr}_4$  solutions in water.

A comparison of the absorption spectra suggests a red-shifted *d-d* absorption band with a peak maximum at 786 nm for  $[\text{Cu}(\text{O}_2\text{C}-(\text{CH}_2)_3-\text{NH}_3)_2]\text{PbBr}_4$  compared to a peak maximum of 768 nm for  $[\text{Cu}(\text{O}_2\text{C}-\text{CH}_2-\text{NH}_2)_2]\text{Pb}_2\text{Br}_4$ .

## 10. Small-Angle X-Ray Scattering (SAXS)

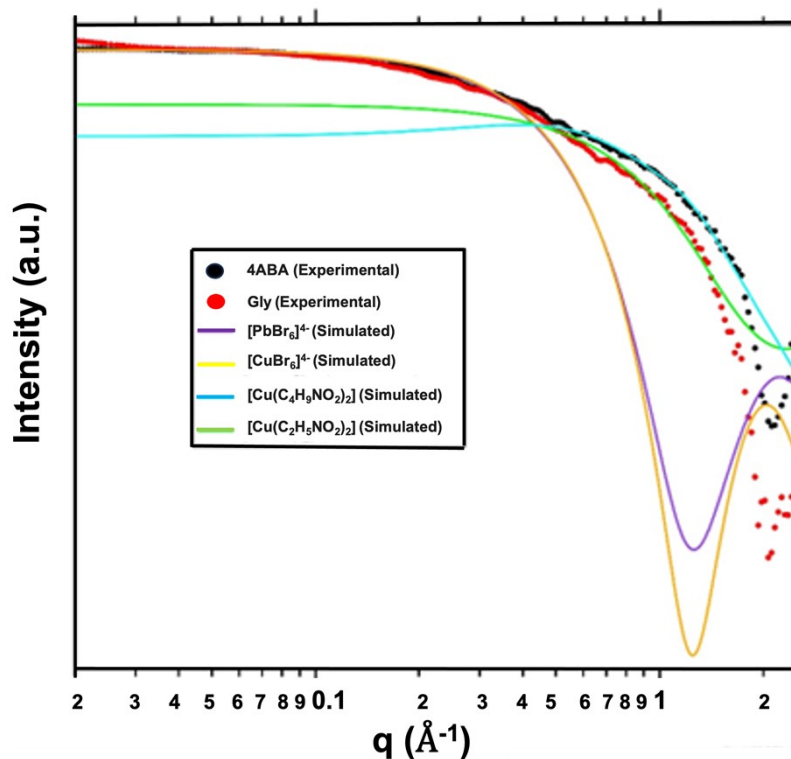

**Figure S10.** Measured SAXS data (red and black dotted lines) of  $[\text{Cu}(\text{O}_2\text{C}-\text{CH}_2-\text{NH}_2)_2]\text{Pb}_2\text{Br}_4$  (labelled as Gly) and (b)  $[\text{Cu}(\text{O}_2\text{C}-(\text{CH}_2)_3-\text{NH}_3)_2]\text{Pb}_2\text{Br}_4$  (labelled as 4ABA) compared to the simulated SAXS curves (solid lines) for  $[\text{PbBr}_6]^{4-}$ ,  $[\text{CuBr}_6]^{4-}$ ,  $[\text{Cu}(\text{C}_4\text{H}_9\text{NO}_2)_2]$  and  $[\text{Cu}(\text{C}_2\text{H}_5\text{NO}_2)_2]$ .

The acquired SAXS curves for  $[\text{Cu}(\text{O}_2\text{C}-\text{CH}_2-\text{NH}_2)_2]\text{Pb}_2\text{Br}_4$  and  $[\text{Cu}(\text{O}_2\text{C}-(\text{CH}_2)_3-\text{NH}_3)_2]\text{Pb}_2\text{Br}_4$  solutions agree well with the simulated curves of  $[\text{PbBr}_6]^{4-}$  and  $[\text{CuBr}_6]^{4-}$  in the range of  $q = 0.018\text{--}0.14 \text{ \AA}^{-1}$  (Figure S9). Even though  $\text{CuBr}_2$  was used in a  $\sim 10$ -fold excess compared to  $\text{PbBr}_2$  in each solution, the high electron density of Pb implied that both species could contribute substantial scattering in this region. Above  $q = 0.14 \text{ \AA}^{-1}$ , scattering from less electron dense species was observed and attributed to Cu/amino acid complexes. The experimental curve of  $[\text{Cu}(\text{O}_2\text{C}-(\text{CH}_2)_3-\text{NH}_3)_2]\text{Pb}_2\text{Br}_4$  overlapped with the simulated curve of  $[\text{Cu}(\text{C}_4\text{H}_9\text{NO}_2)_2]$  from  $q = 0.15\text{--}1.7 \text{ \AA}^{-1}$ , and the experimental curve of  $[\text{Cu}(\text{O}_2\text{C}-\text{CH}_2-\text{NH}_2)_2]\text{Pb}_2\text{Br}_4$  overlapped with the simulated curve of  $[\text{Cu}(\text{C}_2\text{H}_5\text{NO}_2)_2]$  from  $q = 0.15\text{--}1.3 \text{ \AA}^{-1}$ . Based on the agreement with simulated scattering curves in the low and high  $q$  regions, SAXS of  $[\text{Cu}(\text{O}_2\text{C}-\text{CH}_2-\text{NH}_2)_2]\text{Pb}_2\text{Br}_4$  and  $[\text{Cu}(\text{O}_2\text{C}-(\text{CH}_2)_3-\text{NH}_3)_2]\text{Pb}_2\text{Br}_4$  suggested a mixture of small solution species was present in both samples before crystallization. This was further confirmed by ESI-MS studies.

## 11. ESI-MS measurement results

The ESI-MS of  $[\text{Cu}(\text{O}_2\text{C}-\text{CH}_2-\text{NH}_2)_2]\text{Pb}_2\text{Br}_4$  in positive mode produced more extensive fragmentation than  $[\text{Cu}(\text{O}_2\text{C}-(\text{CH}_2)_3-\text{NH}_3)_2]\text{PbBr}_4$  which impeded the detection of any Cu/glycine/Br species. The fragmentation of glycine in mass spectrometry is well noted and various pathways have studied.<sup>1</sup> For  $[\text{Cu}(\text{O}_2\text{C}-(\text{CH}_2)_3-\text{NH}_3)_2]\text{PbBr}_4$ , several Cu/4-aminobutyric acid/Br species were identified in the positive mode of ESI-MS (Table S7) and various Cu/Br species were identified in the negative mode of both  $[\text{Cu}(\text{O}_2\text{C}-(\text{CH}_2)_3-\text{NH}_3)_2]\text{PbBr}_4$  and  $[\text{Cu}(\text{O}_2\text{C}-\text{CH}_2-\text{NH}_2)_2]\text{Pb}_2\text{Br}_4$  (Table S6 and S8). Interestingly, one Pb/Br species, i.e.,  $[\text{PbBr}_3]^-$ , was also observed in the negative mode of ESI-MS of both  $[\text{Cu}(\text{O}_2\text{C}-\text{CH}_2-\text{NH}_2)_2]\text{Pb}_2\text{Br}_4$  and  $[\text{Cu}(\text{O}_2\text{C}-(\text{CH}_2)_3-\text{NH}_3)_2]\text{PbBr}_4$  with small relative abundances of 0.11% and 0.50% respectively, which could have been due to small relative concentration or ionization potential. Cu species were observed with Cu(I) and Cu(II) reflecting the redox behavior occasionally seen in ESI-MS. In agreement with SAXS, ESI-MS of  $[\text{Cu}(\text{O}_2\text{C}-\text{CH}_2-\text{NH}_2)_2]\text{Pb}_2\text{Br}_4$  and  $[\text{Cu}(\text{O}_2\text{C}-(\text{CH}_2)_3-\text{NH}_3)_2]\text{PbBr}_4$  suggested a mixture of small solution species was present in both samples. Furthermore, these results showed that Cu/Pb/Br species were more likely to form negative charges while Cu/amino acid/Br species were more likely to form positively charges.

**Table S6.** The results of ESI-MS studies for negative mode of  $[\text{Cu}(\text{O}_2\text{C}-(\text{CH}_2)_3\text{NH}_3)_2]\text{PbBr}_4$  solution.

| Experimental m/z | R.A. (%) | Identified species           | Calc. m/z |
|------------------|----------|------------------------------|-----------|
| 80.9226          | 26.4     | $[\text{Br}]^-$              | 80.9168   |
| 160.8525         | 0.73     | $[\text{HBr}_2]^-$           | 160.843   |
| 222.7780         | 100      | $[\text{CuBr}_2]^-$          | 222.7648  |
| 303.6991         | 8.49     | $[\text{CuBr}_3]^-$          | 303.6811  |
| 366.6322         | 66.71    | $[\text{Cu}_2\text{Br}_3]^-$ | 366.6108  |
| 446.7573         | 0.11     | $[\text{PbBr}_3]^-$          | 446.7288  |
| 447.5534         | 4.04     | $[\text{Cu}_2\text{Br}_4]^-$ | 447.5271  |
| 510.4859         | 11.94    | $[\text{Cu}_3\text{Br}_4]^-$ | 510.4568  |
| 589.4093         | 2.69     | $[\text{Cu}_3\text{Br}_5]^-$ | 589.3751  |
| 654.3395         | 3.41     | $[\text{Cu}_4\text{Br}_5]^-$ | 654.3028  |
| 796.1949         | 3.55     | $[\text{Cu}_5\text{Br}_6]^-$ | 796.1507  |
| 940.0491         | 1.91     | $[\text{Cu}_6\text{Br}_7]^-$ | 939.9967  |
| 1083.9023        | 0.70     | $[\text{Cu}_7\text{Br}_8]^-$ | 1083.8427 |

**Table S7.** The results of ESI-MS studies for positive mode of  $[\text{Cu}(\text{O}_2\text{C}-(\text{CH}_2)_3\text{NH}_3)_2]\text{PbBr}_4$  solution.

| Experimental m/z | R.A. (%) | Identified species                                                              | Calc. m/z |
|------------------|----------|---------------------------------------------------------------------------------|-----------|
| 62.908           | 8.7      | $[\text{Cu}]^+$                                                                 | 62.9291   |
| 86.0377          | 54.61    | $[\text{HO}_2\text{C}_4\text{H}_5]^+$                                           | 86.0362   |
| 87.022           | 54.72    | $[\text{HO}_2\text{C}_4\text{H}_6]^+$                                           | 87.0441   |
| 104.0478         | 86.7     | $[\text{HO}_2\text{C}_4\text{H}_6\text{NH}_3]^+$                                | 104.0706  |
| 165.9705         | 76.54    | $[\text{Cu}(\text{O}_2\text{C}_4\text{H}_6\text{NH}_3)]^+$                      | 165.9924  |
| 246.8913         | 3.34     | $[\text{CuBr}(\text{O}_2\text{C}_4\text{H}_6\text{NH}_3)]^+$                    | 246.9088  |
| 268.0315         | 2.08     | $[\text{Cu}(\text{O}_2\text{C}_4\text{H}_6\text{NH}_2)_2\text{H}]^+$            | 268.0479  |
| 274.2589         | 100      | $[\text{C}_{16}\text{H}_{36}\text{NO}_2]^{+[\text{a}]}$                         | 274.2741  |
| 318.2878         | 11.08    | $[\text{C}_{18}\text{H}_{40}\text{NO}_3]^{+[\text{a}]}$                         | 318.3003  |
| 329.9588         | 16.15    | $[\text{Cu}_2(\text{O}_2\text{C}_4\text{H}_6\text{NH}_2)_2]^+$                  | 329.9697  |
| 330.9639         | 9.36     | $[\text{Cu}_2(\text{O}_2\text{C}_4\text{H}_6\text{NH}_2)_2\text{H}]^+$          | 330.9775  |
| 410.8826         | 10.37    | $[\text{Cu}_2\text{Br}(\text{O}_2\text{C}_4\text{H}_6\text{NH}_2)_2]^+$         | 410.8861  |
| 411.8891         | 3.95     | $[\text{Cu}_2\text{Br}(\text{O}_2\text{C}_4\text{H}_6\text{NH}_2)_2\text{H}]^+$ | 411.8939  |
| 473.8176         | 9.31     | $[\text{Cu}_3\text{Br}(\text{O}_2\text{C}_4\text{H}_6\text{NH}_2)_2]^+$         | 473.8157  |

[a]  $[\text{C}_{16}\text{H}_{36}\text{NO}_2]^+$  and  $[\text{C}_{18}\text{H}_{40}\text{NO}_3]^+$  have previously been identified as contaminants leached from plastic centrifuge tubes<sup>2</sup> which likely occurred due to HBr incompatibility.

**Table S8.** The results of ESI-MS studies for negative mode of  $[\text{Cu}(\text{O}_2\text{C}-\text{CH}_2-\text{NH}_2)_2]\text{Pb}_2\text{Br}_4$  solution.

| Experimental m/z | R.A. (%) | Identified species           | Calc. m/z |
|------------------|----------|------------------------------|-----------|
| 80.9226          | 37.88    | $[\text{Br}]^-$              | 80.9168   |
| 160.8530         | 1.19     | $[\text{HBr}_2]^-$           | 160.8430  |
| 222.7780         | 100      | $[\text{CuBr}_2]^-$          | 222.7648  |
| 303.6991         | 11.86    | $[\text{CuBr}_3]^-$          | 303.6811  |
| 366.6324         | 59.32    | $[\text{Cu}_2\text{Br}_3]^-$ | 366.6108  |
| 446.7542         | 0.50     | $[\text{PbBr}_3]^-$          | 446.7288  |
| 447.5530         | 4.85     | $[\text{Cu}_2\text{Br}_4]^-$ | 447.5271  |
| 510.4860         | 15.19    | $[\text{Cu}_3\text{Br}_4]^-$ | 510.4568  |
| 589.4082         | 5.60     | $[\text{Cu}_3\text{Br}_5]^-$ | 589.3751  |
| 654.3394         | 5.22     | $[\text{Cu}_4\text{Br}_5]^-$ | 654.3028  |
| 796.1953         | 4.15     | $[\text{Cu}_5\text{Br}_6]^-$ | 796.1507  |
| 940.0494         | 1.92     | $[\text{Cu}_6\text{Br}_7]^-$ | 939.9967  |
| 1083.9050        | 0.89     | $[\text{Cu}_7\text{Br}_8]^-$ | 1083.8427 |

## 12. PXRD data for $(\text{C}_6\text{H}_5\text{C}_2\text{H}_4\text{NH}_3)_2\text{PbBr}_4$

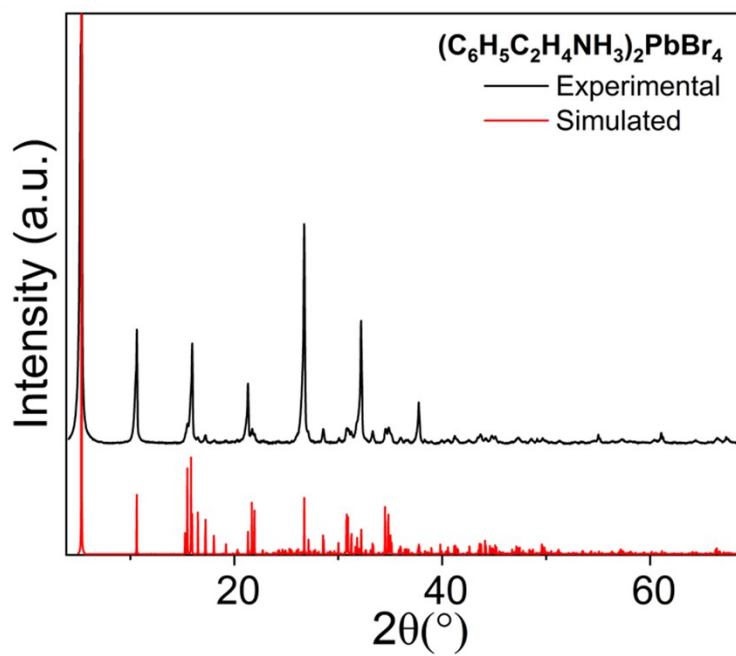

**Figure S11.** PXRD patterns of single crystals synthesized via slow cooling method, compared to the calculated (simulated) XRD pattern for  $(\text{C}_6\text{H}_5\text{C}_2\text{H}_4\text{NH}_3)_2\text{PbBr}_4$ .



### 13. Air stability assessment through PXRD patterns of synthesized crystals

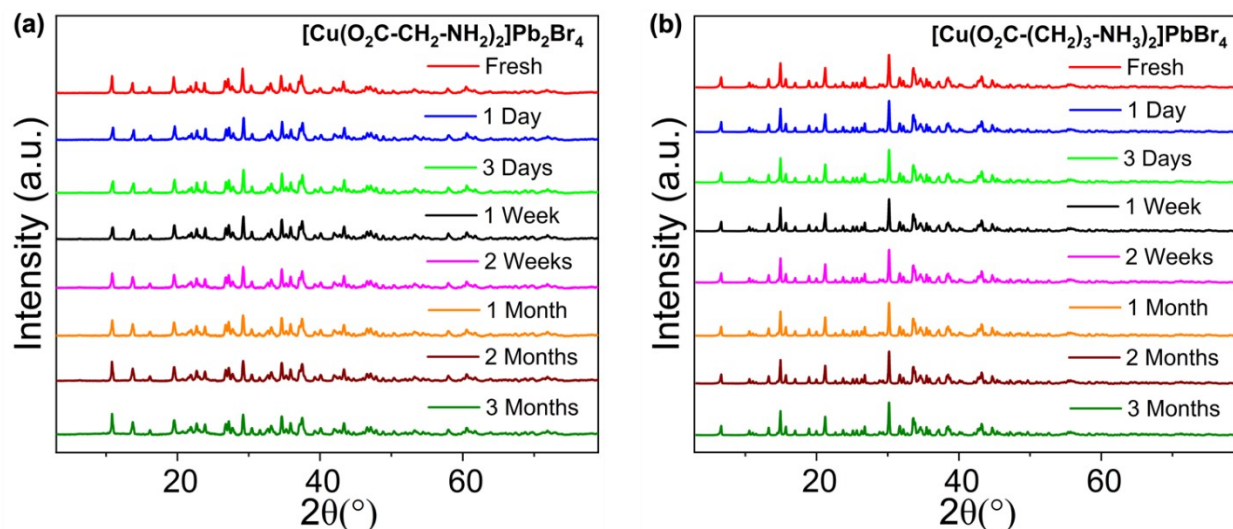

**Figure S12.** PXRD patterns of synthesized (a)  $[\text{Cu}(\text{O}_2\text{C}-\text{CH}_2-\text{NH}_2)_2]\text{Pb}_2\text{Br}_4$  and (b)  $[\text{Cu}(\text{O}_2\text{C}-(\text{CH}_2)_3-\text{NH}_3)_2]\text{PbBr}_4$  crystals using slow evaporation method for 3 months.

### 14. Air stability assessment through PXRD patterns of $(\text{C}_6\text{H}_5\text{C}_2\text{H}_4\text{NH}_3)_2\text{PbBr}_4$ crystals

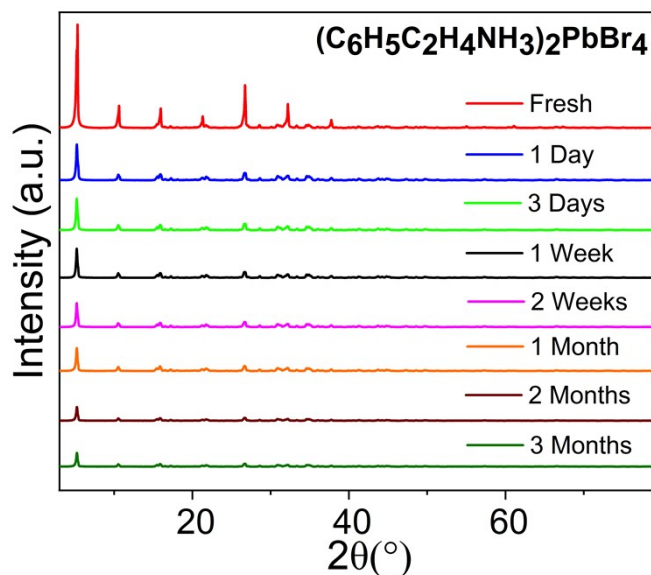

**Figure S13.** PXRD patterns of synthesized  $(\text{C}_6\text{H}_5\text{C}_2\text{H}_4\text{NH}_3)_2\text{PbBr}_4$  crystals using slow cooling method for 3 months.

## 15. Diffuse reflectance and TGA/DSC data for $(C_6H_5C_2H_4NH_3)_2PbBr_4$

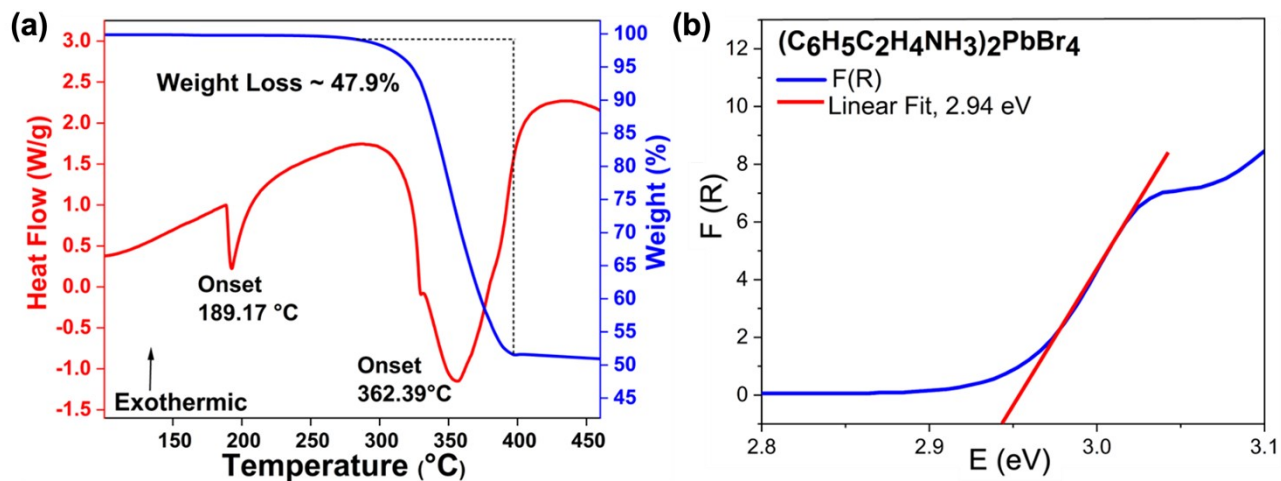

**Figure S14.** (a) Thermogravimetric analysis (TGA) and Differential Scanning Calorimetry (DSC) curves are presented in blue and red, respectively, for  $(C_6H_5C_2H_4NH_3)_2PbBr_4$  and (b) Optical absorption information was acquired using the Kubelka-Munk function, denoted as  $F(R)$ .

## References

- (1) O'Hair, R. A.; Broughton, P. S.; Styles, M. L.; Frink, B. T.; Hadad, C. M. The fragmentation pathways of protonated glycine: a computational study. *J Am Soc for Mass Spectrom* **2000**, *11* (8), 687-696.
- (2) Chai, Y.; Chen, H.; Gao, G.; Liu, X.; Lu, C. Identification of new interferences leached from plastic microcentrifuge tubes in electrospray ionization mass spectrometry. *Rapid Commun. Mass Spectrom.* **2019**, *33* (10), 969-977.
